# Supplementary material
Source: publisher site journal article supplement (https://www.dovepress.com/get_supplementary_file.php?f=413242.xlsx)
Supplement: Supplementary file 1 [file get_supplementary_file.php]

## Sheet: GA_VEI_VEEN1
GA	Vascular endothelial injury	GA|Vascular endothelial injury
PRKCH	VEGFA	PTPN11
HSD11B2	FLT1	PTPN1
HSD11B1	VEGFC	CTNNB1
AKR1B10	VCAM1	GJA1
PTGES	IL6	JUP
AR	FLT4	BMP2
PTPN2	COL8A2	ALB
CYP2E1	PECAM1	AKR1B1
CTNNA1	TNF	PPIA
APOA2	VEGFD	MAPK1
STS	VEGFB	ITGAL
PIM1	VWF	KDR
AKR1C2	ZEB1	MAPK10
THRB	COL3A1	MAPK14
MAOB	ENG	PGR
GC	PIK3CA	TTR
HSD17B11	ICAM1	PPARG
KIF11	CDH5	MAPK8
CA2	HIF1A	ESR1
CHEK1	TCF4	NR3C2
CES1	SELE	EGFR
MAPKAPK2	CXCL8	BRAF
CLPP	FGF2	SRC
CCNA2	SERPINE1	PDPK1
CASP7	EDN1	ANXA5
HSD17B1	THBD	DPP4
PNP	ANGPT1	F10
BCHE	IL1B	ADAM17
CTSV	APOE	GSR
CA1	TGFB1	IGF1R
MMP13	SELP	CDK2
CFB	TP53	EPHB4
ADH1B	CCL2	MET
BACE1	PDGFRB	FGFR1
PPP5C	NOS2	PPARA
SULT2A1	NRP1	PARP1
PNMT	ANGPT2	PGF
HPGDS	MMP9	REN
SEC14L2	HMOX1	FGFR2
GSTA1	ACE	F2
CFD	PTGS2	PLA2G2A
TYMS	CRP	HSP90AA1
HSPA8	AGBL1	MDM2
MTAP	PTEN	NR1H2
PDE4B	SOD1	TGFBR1
GSTP1	IL10	SOD2
RXRA	CAV1	NOS3
TNNC1	PDGFB	RBP4
CSNK2A1	F3	MMP12
FNTA	EPAS1	TEK
DUSP6	EPO	PIK3CG
PLA2G10	PLAT	RARA
DHODH	FN1	IGF1
RORA	IFNG	SYK
TTPA	ACVRL1	MMP3
PLK1	MTHFR	MMP2
AURKA	KNG1	NR3C1
AKR1C3	KRIT1	IL2
SHBG	STAT3	ELANE
AKR1C1	TLR4	ESR2
SORD	NOTCH1	HMGCR
PPARD	F5	CASP3
FABP7	HGF	MAP2K1
ADK	NFE2L2	F7
GSK3B	VSX1	JAK2
PDE4D	APP	LCN2
LCK	LYVE1	PLAU
ABO	BCL2	HMGB1
CDK6	MPO	ACHE
PDE3B	NRP2
WAS	CCN2
ESRRA	IL1A
HDAC8	INS
ITK	CD34
ESRRG	COL4A1
CPB1	XDH
ADH5	THBS1
FABP5	BMPR2
PAK5	GNA11
LSS	GNAQ
EPHX2	RASA1
TRAPPC3	AGT
YARS1	CCM2
METAP2	BMP6
PRKACA	PROCR
SULT2B1	ITGB3
FABP6	OLR1
DHFR	TJP1
PAH	EGF
NR1I3	CXCL12
ADH1C	HSPG2
NR1H4	ESM1
THRA	ELN
FABP3	AGER
BCAT2	JUN
MMP8	PLG
JAK3	SPP1
NQO1	ADIPOQ
PDK2	NOTCH3
NR1H3	MYLK
BLVRB	KRAS
DCK	PDCD10
ACP3	AGTR1
PADI4	LEP
FABP4	BDNF
HNMT	FGF1
FKBP1A	ACTA2
CBR1	CXCR4
MTHFD1	KIT
RARB	CAT
GM2A	IL4
CYP2C8	TYMP
CTSK	CD36
CRABP2	CYP1B1
HNF4G	SERPINC1
ERBB4	DLL4
SERPINA1	S1PR1
AMY1A	SELL
CSK	MTOR
VDR	VHL
ZAP70	GFAP
RXRB	COL8A1
PCK1	ITGB2
NQO2	RHOA
DPEP1	TIMP1
SULT1E1	ITGB1
TGM3	SP1
PRKCQ	IL18
UCK2	NGF
FECH	NOS1
RARG	DCN
S100A9	ITGA4
BST1	CFH
ALDH2	ELMO2
BIRC7	MADCAM1
CCNT1	CCND1
NR1I2	BAX
XIAP	FBN1
AGXT	ITGAM
ACADM	MMP1
PLEKHA4	CSF3
SETD7	FGA
PSAP	AOC3
HDAC2	RAC1
ALK	NOX4
GLO1	F2R
HSP90AB1	F8
	TGFB2
	CST3
	NPPB
	FASLG
	TNFRSF11B
	PDPN
	S100B
	FBLN5
	NTRK1
	SLC2A1
	PTGS1
	TGFBR2
	MAPT
	PROK1
	SERPINF1
	ANTXR1
	PRKCA
	SMAD4
	PF4
	EDF1
	NPPA
	LPL
	EP300
	ESAM
	AQP1
	F2RL1
	TIE1
	ADAMTS13
	HLA-DRB1
	CXCL10
	ADM
	FAS
	TNFSF15
	CD40LG
	NFKB1
	MYC
	COL5A1
	FZD4
	VIM
	MGP
	PDGFRA
	RTN4
	NDP
	PITX2
	TIMP2
	CD44
	FOS
	MAPK3
	SIRT1
	APOA1
	MYH11
	PTK2
	TNFRSF1A
	SMAD3
	CYBB
	MBP
	TERT
	ENO2
	XBP1
	VTN
	GRIN2B
	ERBB2
	PIK3R1
	SETD2
	GP1BA
	TSC2
	PDGFA
	CXCL1
	CLU
	JAM2
	STAT1
	PROC
	KAT6B
	AKT3
	RELA
	COL4A3
	HRAS
	FOXC1
	GRIN1
	PSEN1
	COL1A1
	AQP4
	CREBBP
	HBEGF
	MIF
	NFKBIA
	BMP4
	NT5E
	PEAR1
	IL17A
	NAMPT
	CDH2
	SMAD2
	LOX
	PON1
	CD40
	GPT
	ETS1
	CASP8
	HSPA4
	GJB2
	RAF1
	CCL5
	EDNRB
	COL4A2
	COMT
	MCAM
	YAP1
	TGFBI
	APOB
	ABCB1
	CBS
	PCNA
	TSPAN12
	TREX1
	CD46
	CSF2
	CCR6
	IL1RN
	EGFL7
	BSG
	GATA2
	CDKN1A
	PRKCB
	HTR2A
	EFEMP2
	EDNRA
	MMP14
	TLR2
	JAG1
	PAX6
	CALCA
	LMNA
	APOH
	ANGPTL4
	ITGAV
	DUSP29
	NF1
	PLAUR
	ACE2
	PIK3CB
	PRL
	TGFA
	JAM3
	IL33
	FGB
	TGFB3
	KRT3
	EGR1
	HSPB1
	NLRP3
	BCL2L1
	PTX3
	PROX1
	SERPINA3
	RETN
	KITLG
	EFNB2
	DLL1
	ABCC6
	C3
	FOXE3
	GAPDH
	ENPP1
	FLNA
	PRKG1
	PTK2B
	HTRA1
	CCNH
	COL18A1
	KLF2
	CHAT
	HFE
	IL13
	TSC1
	MUC1
	PIK3R2
	RHOD
	PTPRB
	CERCAM
	PTN
	SDHB
	LRP5
	AGGF1
	PIK3C2A
	RAP1A
	CSF1
	CXCR3
	PPBP
	CX3CR1
	GNA14
	KL
	CD14
	CYCS
	ECE1
	CDC42
	AHSP
	ANG
	HP
	SST
	HLA-B
	CDKN3
	ADAMTSL1
	TXN
	TF
	GDNF
	NR4A1
	CREB1
	IL2RA
	ACTC1
	PXDN
	IGFBP3
	S1PR3
	ODC1
	SLC6A4
	ADA2
	CLDN5
	PXN
	MECP2
	AIMP1
	GLMN
	LDLR
	CCN1
	HSPD1
	KCNK3
	THPO
	DRD2
	CYBA
	OSM
	CDH1
	TNFAIP3
	PLXDC1
	WWTR1
	BIRC5
	NOD2
	FCGR2A
	GP6
	TRPV4
	MT-ND1
	F9
	SELPLG
	CHST6
	PLA2G7
	PRKCZ
	KLF4
	PLA2G6
	CD55
	SPARC
	CDKN1B
	ATRIP
	PRTN3
	PRSS23
	IGF2
	ITGA2
	IFNA1
	GHRL
	HEY2
	MBNL1
	CD4
	NOX1
	PKD1
	RET
	FGFR3
	TNFRSF11A
	UBIAD1
	SYNGAP1
	AIF1
	ITGA2B
	CDKN2A
	ICAM2
	TNFSF10
	KCNMA1
	IL1R1
	STAB1
	SHC1
	ABL1
	FOXO1
	FLT3
	IL6R
	MYD88
	PROM1
	EDIL3
	CFI
	LGALS3
	CYP2C19
	RUNX2
	HAVCR1
	CXCL2
	MB
	CXCR2
	ALOX5
	NOTCH2
	ABCA1
	APLN
	ARG1
	SOD3
	MEF2C
	IGFBP7
	NOTCH4
	LIF
	ITGA5
	CALCRL
	COL4A4
	CALR
	ROBO4
	CX3CL1
	SCN9A
	TKT
	AXL
	NEFL
	DIPK1A
	GPER1
	SLC17A5
	CD248
	ADRB2
	SLC4A1
	PMS2
	RHO
	TNFSF12
	PLVAP
	ALOX12
	CAMTA1
	ARNT
	LPA
	RPL5
	OCLN
	PLCG1
	CTNND1
	PRKCD
	CETP
	HPSE
	GCH1
	LPAR1
	TGIF1
	NES
	SDHD
	SULT1A3
	HLA-A
	VCL
	WT1
	ATP1B1
	F13A1
	SPTAN1
	PRKD1
	PRKD2
	CACNA1A
	TNC
	CASP9
	UCHL1
	ROCK2
	GAS6
	TNFSF11
	LAMC1
	RETREG1
	GBA
	FOXP1
	C4A
	FGF7
	ADAM10
	GATA4
	CDH13
	NGFR
	S1PR2
	B2M
	ARID1B
	GH1
	PRDX5
	PRDX2
	PSEN2
	CSPG4
	TAGLN
	ITGB4
	TBX1
	ROCK1
	PTGIS
	LEMD3
	SMARCA4
	MYOCD
	AKT2
	LIPC
	DNMT1
	CCL3
	FGF23
	MME
	TNFRSF1B
	CFLAR
	FOXO3
	COL1A2
	TIMP3
	IRF5
	C9orf72
	NINJ1
	CSF1R
	KRT7
	ZNF469
	NPPC
	ELAVL1
	IRAK1
	SARS1
	APLNR
	MAP3K5
	BCOR
	CDK4
	C5
	HSPA5
	CCR2
	MKI67
	GATA6
	ANPEP
	NR4A3
	CTLA4
	CEACAM1
	TH
	NPY
	MEFV
	BGN
	HRG
	CTSB
	BMX
	DPYD
	FYN
	SHH
	CD47
	IGFBP1
	ADA
	SQSTM1
	SMTN
	ADORA2A
	CCR5
	LEPR
	SLC20A2
	NRAS
	WNT5A
	PLA2G4A
	PKD2
	CASP1
	HSPA1A
	COMP
	PRKN
	KRT20
	IL6ST
	FLI1
	PDGFC
	SLC2A10
	HBB
	HLA-G
	TFE3
	MFN2
	PCDH12
	MPDZ
	PALS1
	CCL11
	RARRES2
	DGKE
	IRS1
	BMP7
	IL5
	CD59
	ANXA2
	PIGF
	SREBF1
	BDKRB2
	ITGA6
	ITGA3
	ZNF408
	NTRK2
	CXCL9
	CNR1
	DDAH1
	BGLAP
	AHR
	VASH1
	AFP
	SCARB1
	SEMA3A
	SPEG
	RB1
	RYR1
	STXBP1
	PRDX6
	LRP1
	GATA3
	IL15
	IL3
	GRB2
	HPRT1
	LMX1B
	CP
	CAMK2G
	NRG1
	HDAC4
	MAF
	SDC1
	FCGR2B
	AGTR2
	PPP3CA
	INPP5E
	IRF3
	INSR
	FGG
	TFPI
	F11R
	RPS6KB1
	MBL2
	EPRS1
	DUSP1
	DDAH2
	CDK1
	ANXA1
	CYSLTR2
	GPX1
	CHUK
	PLPP3
	COL4A5
	HRH1
	POMC
	VIP
	KRT8
	COX5A
	RHOB
	ADCY10
	CAV2
	GLA
	POGZ
	MDK
	SFTPC
	ACP1
	RAP1B
	PDE3A
	ATM
	ABCC1
	TFRC
	KRT18
